# Supplementary material for: Lysine succinylation on non-histone chromosomal protein HMG-17 (HMGN2) regulates nucleosomal DNA accessibility by disrupting the HMGN2–nucleosome association
Source: Royal Society of Chemistry journal article supplement (doi:10.1039/d1cb00070e), 2021-01-01
Supplement: d1cb00070e1.pdf [file d1cb00070e1.pdf]

SUPPLEMENTAL INFORMATION

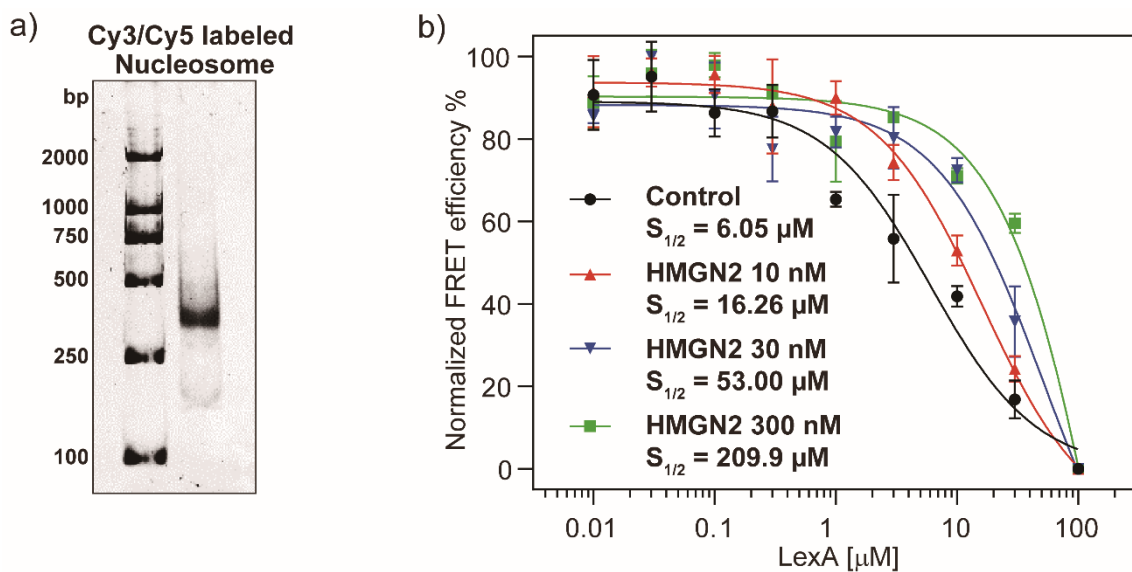

**Figure S1.** (a) The purity of Cy3/Cy5 labeled nucleosome for the FRET-based LexA titration experiments. (b) The LexA titration curves for nucleosomes incubating with different concentrations of unmodified HMGN2.
